# Supplementary material for: CpG islands under selective pressure are enriched with H3K4me3, H3K27ac and H3K36me3 histone modifications
Source: PubMed Central journal article supplement (PMC3711888; doi:10.1186/1471-2148-13-145), 2013-07-10

# H3K27ac enrichment in 3' CGIs

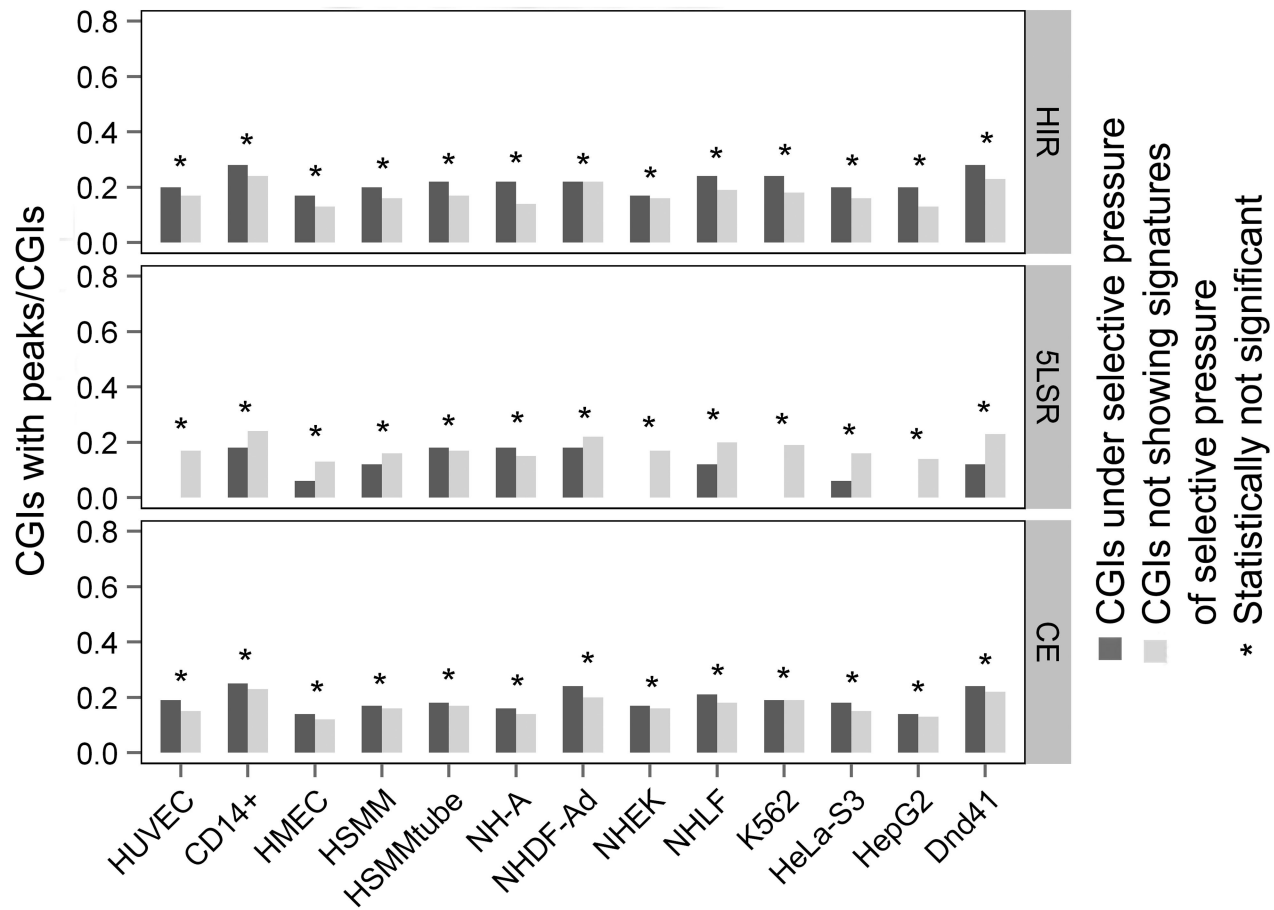

Supplement: 1471-2148-13-145-S13.pdf [file 1471-2148-13-145-S13.pdf]
